# Supplementary material for: Experimental design and theoretical calculation for sulfur-doped carbon nanofibers as a high performance sodium-ion battery anode
Source: Royal Society of Chemistry journal article supplement (doi:10.1039/c9ta02107h), 2019-01-01
Supplement: c9ta02107h1.pdf [file c9ta02107h1.pdf]

## Support Information

### Experimental Design and Theoretical Calculation for Sulfur-Doped Carbon Nanofibers as High Performance Sodium-Ion Battery Anode

Qianzheng Jin<sup>ab</sup>, Wei Li<sup>a</sup>, Kangli Wang<sup>\*a</sup>, Pingyuan Feng<sup>b</sup>, Haomiao Li<sup>a</sup>, Tiantian Gu<sup>b</sup>, Min Zhou<sup>a</sup>, Wei Wang<sup>b</sup>, Shijie Cheng<sup>a</sup>, Kai Jiang<sup>\*ab</sup>

<sup>a</sup>State Key Laboratory of Advanced Electromagnetic Engineering and Technology

School of Electrical and Electronic Engineering

Huazhong University of Science and Technology

Wuhan 430074, P. R. China

<sup>b</sup>State Key Laboratory of Materials Processing and Die & Mould Technology

School of Materials Science and Engineering

Huazhong University of Science and Technology

Wuhan 430074, P. R. China

**\*corresponding authors** - klwang@hust.edu.cn; kjiang@hust.edu.cn

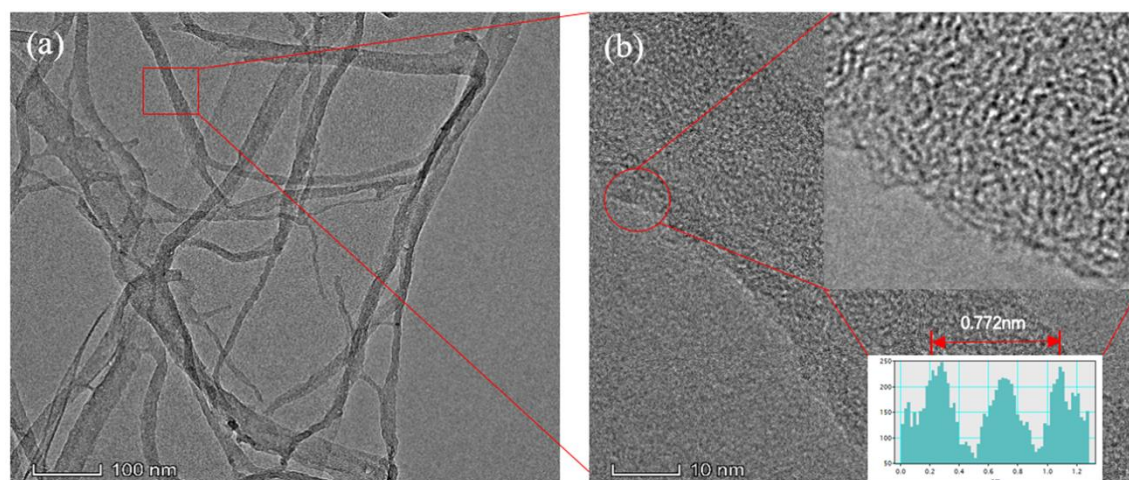

**Figure S1.** a) The transmission electron microscopy (TEM) of CNFs. b) The inserts are the high-resolution TEM

image and lattice distance of S-CNf in (a) with red rectangle.

**Table S1.** The surface analysis reports for CNFs and S-CNFs.

|        | Total surface area<br>(m <sup>2</sup> g <sup>-1</sup> ) | Micropore surface area<br>(m <sup>2</sup> g <sup>-1</sup> ) |
|--------|---------------------------------------------------------|-------------------------------------------------------------|
| CNFs   | 465                                                     | 230                                                         |
| S-CNFs | 669                                                     | 439                                                         |

**Table S2.** The carbon, sulfur and oxygen contents from XPS and element analysis.

|        |   | Chemical composition (wt%) |              | Element content<br>(wt%) |
|--------|---|----------------------------|--------------|--------------------------|
|        |   | Atomic content             | Mass content |                          |
| S-CNFs | C | 84.34                      | 76.31        | 76.31                    |
|        | O | 11.67                      | 14.06        | 13                       |
|        | S | 7.98                       | 15.00        | 17.44                    |
| CNFs   | C | 89.16                      | 85.84        | 90                       |
|        | O | 10.63                      | 13.63        | 14.16                    |
|        | S | -                          | -            | -                        |

**Table S3.** The kinetic parameters obtained from equivalent circuit fitting of experimental data for CNFs, S-CNFs.

|        | R <sub>s</sub> (Ω) | R <sub>ct</sub> (Ω) |
|--------|--------------------|---------------------|
| CNFs   | 3.488              | 460.7               |
| S-CNFs | 1.838              | 325.7               |

**Noting:** Randles equivalent circuit for CNFs, S-CNFs electrode/electrolyte interface. R<sub>s</sub> is the electrolyte resistance. CPE<sub>1</sub> and R<sub>ct</sub> are the capacitance and charge-transfer resistance, respectively. W<sub>1</sub> is the Warburg impedance related to the diffusion of sodium ions into the bulk electrodes.

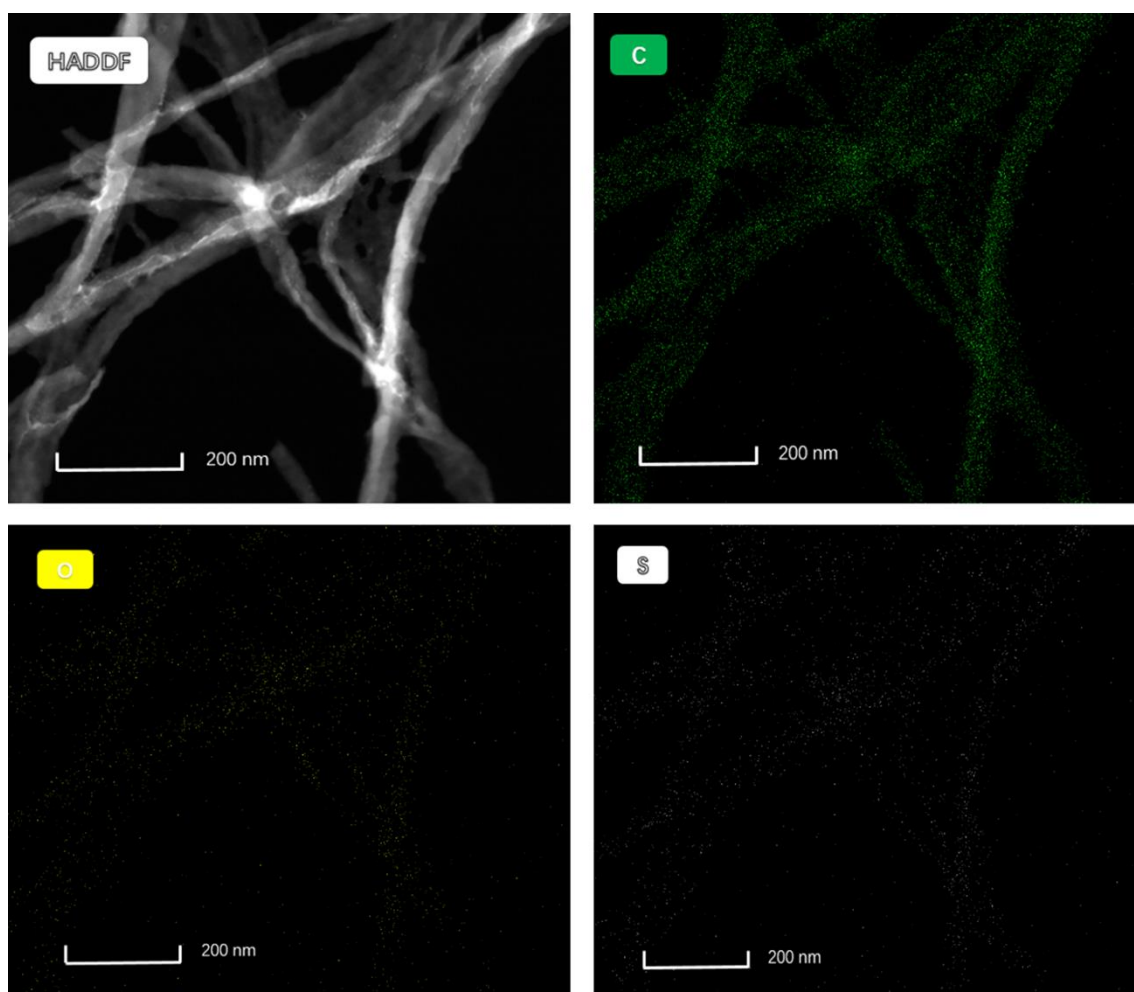

**Figure S2.** The HADDF (High-Angle Annular Dark Field) image and Mappings of element C, O, S by STEM for S-CNFs.

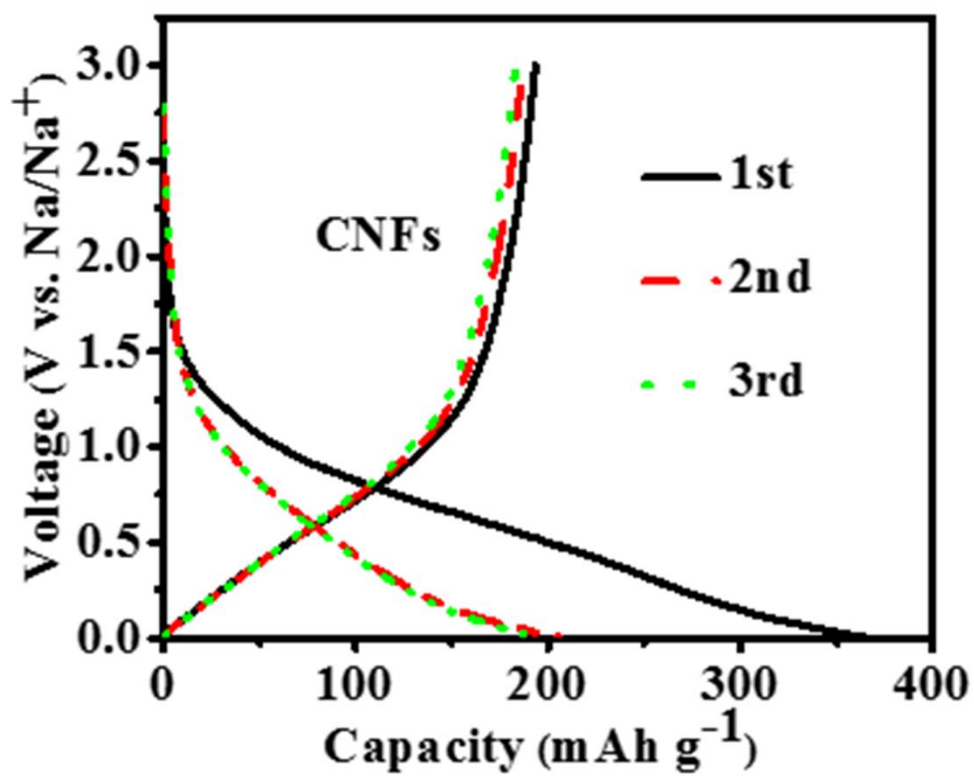

**Figure S3.** The discharge/charge curves at 50 A g<sup>-1</sup> for CNFs.

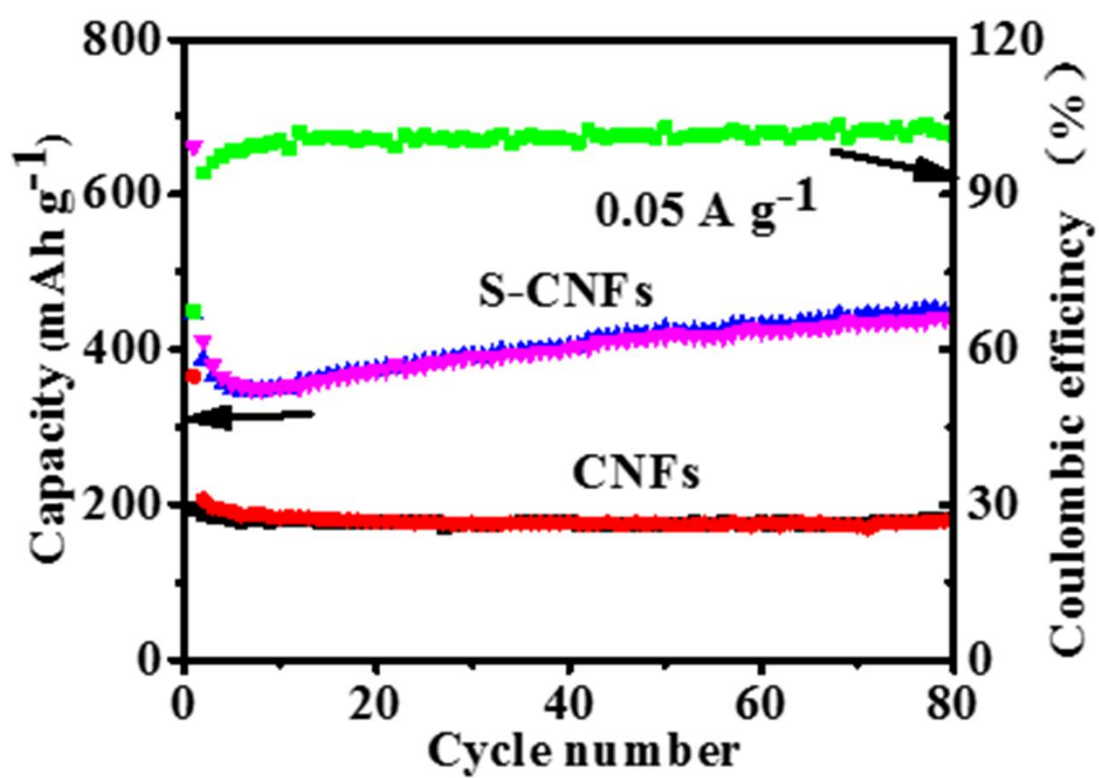

Figure S4. The cycling performances of CNFs and S-CNFs at  $0.05 \text{ A g}^{-1}$ .

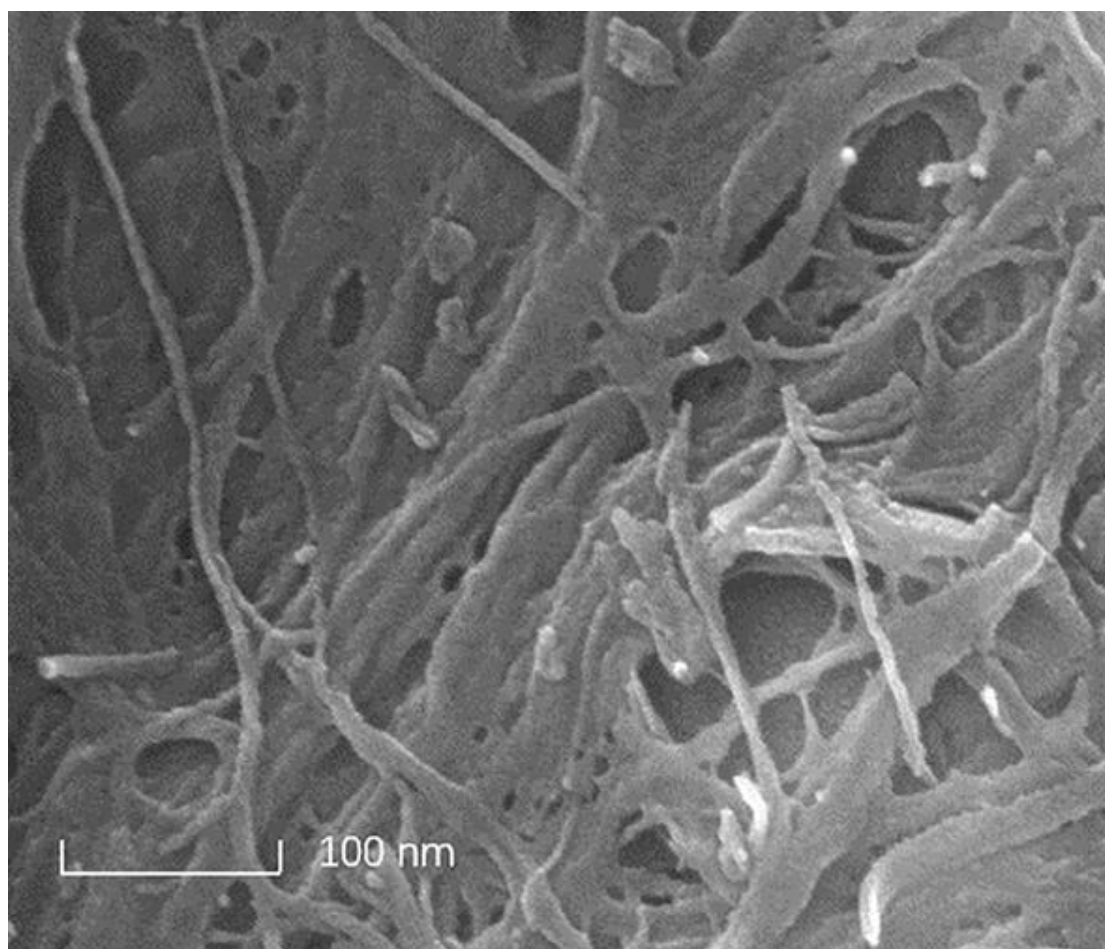

**Figure S5.** The SEM image of after 1000 cycles for S-CNFs.

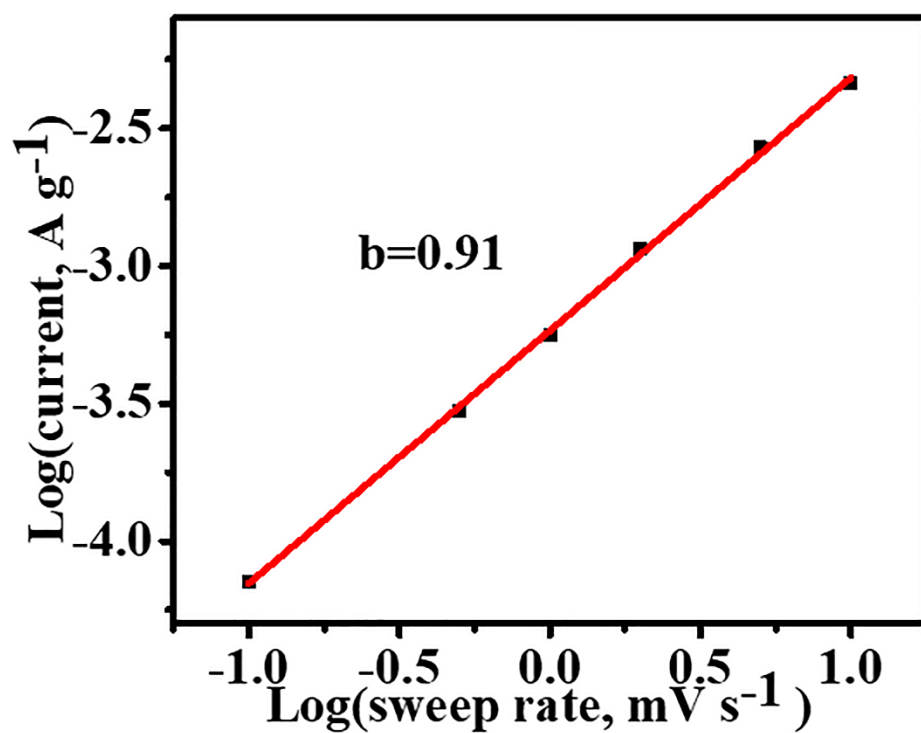

**Figure S6.** The b-value calculated by log (sweep rate)-log (peak current) curve at anode peak.

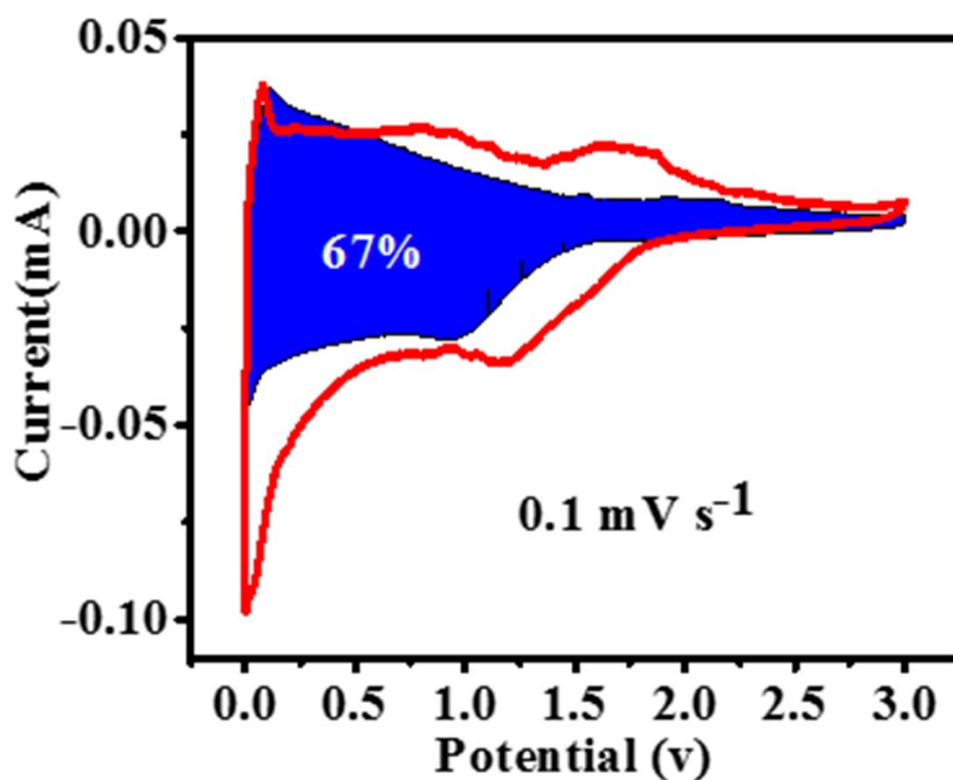

**Figure S7.** The contribution and distribution of the electrochemical capacitance at 0.1 mV s<sup>-1</sup>.

**Supplementary method.** In order to obtain the contributions of capacitance and diffusion, various cyclic voltammetry measurements (CVs) were performed at range of 0.1-10 mV s<sup>-1</sup>. Firstly, according to the  $I(v) = av^b$ , the controlled process was determined by the  $b$  value. Then, the individual capacity was separated by the formula:  $I(v) = k_1v^{1/2} + k_2v$ . The current values at a fixed voltage were calculated by CVs at sweep rates of 0.1-10 mV s<sup>-1</sup>. Consequently, the  $k_1$  and  $k_2$  at a fixed voltage were obtained by drawing plots of  $I/v^{1/2}$  vs.  $v^{1/2}$ . Finally, the  $k_1$  and  $k_2$  at different voltages could be obtained, and the capacitive induced and diffusion induced contributions were determined, respectively.

**Table S4.** The energy values at different doping sites.

| Doping sites  | D <sub>1</sub> | D <sub>2</sub> | D <sub>3</sub> | D <sub>4</sub> |
|---------------|----------------|----------------|----------------|----------------|
| Energy values | -10402.087     | -10402.595     | -10402.003     | -10402.663     |
| (eV)          |                |                |                |                |
